# Supplementary material for: The individual environment, not the family is the most important influence on preferences for common non-alcoholic beverages in adolescence
Source: PubMed Central journal article supplement (PMC5715117; doi:10.1038/s41598-017-17020-x), 2017-12-04
Supplement: 41598_2017_17020_MOESM1_ESM.pdf [file 41598_2017_17020_MOESM1_ESM.pdf]

## **Online-only supplemental materials**

**The individual environment, not the family is the most important influence on preferences for common non-alcoholic beverages in adolescence**

Andrea D Smith, Alison Fildes, Suzanna Forwood, Lucy Cooke, and Clare Llewellyn

**Supplemental Table 1** Model fit and parameter estimates for the saturated, ADE model and submodels of beverage preferences

| Beverage type            | Additive genetic effect (A) | Dominant genetic effect (D) | Nonshared environment effect (E) | -2LL <sup>3</sup> | Df <sup>3</sup> | AIC <sup>3</sup> | Δ -2LL            | p-value     |
|--------------------------|-----------------------------|-----------------------------|----------------------------------|-------------------|-----------------|------------------|-------------------|-------------|
| <b>SSBs<sup>3</sup></b>  |                             |                             |                                  |                   |                 |                  |                   |             |
| Sat                      |                             |                             |                                  | 9609.825          | 2832            | 3945.825         |                   |             |
| ADE <sup>1</sup>         | <b>0.30 (0.24, 0.43)</b>    | <b>0.08 (0.00, 0.17)</b>    | <b>0.62 (0.55, 0.70)</b>         | <b>9614.131</b>   | <b>2835</b>     | <b>3944.131</b>  | <b>4.305359</b>   | <b>0.23</b> |
| AE <sup>2</sup>          | 0.39 (0.32, 0.46)           | -                           | 0.61 (0.54, 0.68)                | 9616.851          | 2836            | 3944.851         | 2.719993          | 0.10        |
| DE <sup>2</sup>          | -                           | 0.24 (0.19, 0.29)           | 0.76 (0.71, 0.81)                | 9631.547          | 2836            | 3959.547         | 17.416468         | <0.001      |
| E <sup>2</sup>           | -                           | -                           | 1.00 (1.00, 1.00)                | 9703.572          | 2837            | 4029.572         | 89.441158         | <0.001      |
| <b>NNSBs<sup>3</sup></b> |                             |                             |                                  |                   |                 |                  |                   |             |
| Sat                      |                             |                             |                                  | 9545.841          | 2818            | 3909.841         |                   |             |
| ADE <sup>1</sup>         | <b>0.23 (0.10, 0.36)</b>    | <b>0.16 (0.07, 0.25)</b>    | <b>0.61 (0.53, 0.68)</b>         | <b>9546.322</b>   | <b>2821</b>     | <b>3904.322</b>  | <b>4.804889</b>   | <b>0.92</b> |
| AE <sup>2</sup>          | 0.43 (0.36, 0.49)           | -                           | 0.57 (0.51, 0.64)                | 9558.221          | 2822            | 3914.221         | 11.8991220        | <0.001      |
| DE <sup>2</sup>          | -                           | 0.28 (0.23, 0.33)           | 0.72 (0.67, 0.77)                | 9557.576          | 2822            | 3913.576         | 11.2537105        | <0.001      |
| E <sup>2</sup>           | -                           | -                           | 1.00 (1.00, 1.00)                | 9660.699          | 2823            | 4014.699         | 114.3772631       | <0.001      |
| <b>Orange juice</b>      |                             |                             |                                  |                   |                 |                  |                   |             |
| Sat                      |                             |                             |                                  | 7844.431          | 2840            | 2164.431         |                   |             |
| ADE <sup>1</sup>         | 0.24 (0.18, 0.32)           | 0.00 (0.00, 0.04)           | 0.76 (0.68, 0.83)                | 7854.672          | 2843            | 2168.672         | 10.241            | 0.02        |
| AE <sup>2</sup>          | <b>0.24 (0.20, 0.32)</b>    | -                           | <b>0.76 (0.68, 0.80)</b>         | <b>7854.672</b>   | <b>2844</b>     | <b>2166.672</b>  | <b>0</b>          | <b>1.00</b> |
| DE <sup>2</sup>          | -                           | 0.08 (0.03, 0.14)           | 0.92 (0.86, 0.97)                | 7873.266          | 2844            | 2185.266         | 18.594            | <0.001      |
| E <sup>2</sup>           | -                           | -                           | 1.00 (1.00, 1.00)                | 7881.523          | 2845            | 2191.523         | 26.851            | <0.001      |
| <b>Fruit cordial</b>     |                             |                             |                                  |                   |                 |                  |                   |             |
| Sat                      |                             |                             |                                  | 8031.215          | 2838            | 2355.215         |                   |             |
| ADE <sup>1</sup>         | <b>0.28 (0.15, 0.41)</b>    | <b>0.14 (0.05, 0.23)</b>    | <b>0.58 (0.51, 0.65)</b>         | <b>8034.727</b>   | <b>2841</b>     | <b>2352.727</b>  | <b>3.511726</b>   | <b>0.32</b> |
| AE <sup>2</sup>          | 0.44 (0.38, 0.51)           | -                           | 0.56 (0.49, 0.62)                | 8043.012          | 2842            | 2359.012         | 8.285402          | <0.001      |
| DE <sup>2</sup>          | -                           | 0.29 (0.24, 0.34)           | 0.71 (0.66, 0.76)                | 8051.672          | 2842            | 2367.672         | 16.944929         | <0.001      |
| E <sup>2</sup>           | -                           | -                           | 1.00 (1.00, 1.00)                | 8157.514          | 2843            | 2471.514         | 122.786607        | <0.001      |
| <b>Milk</b>              |                             |                             |                                  |                   |                 |                  |                   |             |
| Sat                      |                             |                             |                                  | 7269.105          | 2698            | 1873.105         |                   |             |
| ADE <sup>1</sup>         | 0.36 (0.21, 0.44)           | 0.00 (0.00, 0.11)           | 0.64 (0.56, 0.72)                | 7277.283          | 2701            | 1875.283         | 8.17838241        | 0.04        |
| AE <sup>2</sup>          | <b>0.36 (0.28, 0.44)</b>    | -                           | <b>0.64 (0.56, 0.72)</b>         | <b>7277.284</b>   | <b>2702</b>     | <b>1873.284</b>  | <b>0.00117151</b> | <b>0.97</b> |
| DE <sup>2</sup>          | -                           | 0.20 (0.14, 0.26)           | 0.80 (0.74, 0.86)                | 7298.526          | 2702            | 1894.526         | 21.24340108       | <0.001      |
| E                        | -                           | -                           | 1.00 (1.00, 1.00)                | 7340.874          | 2703            | 1934.874         | 63.59133945       | <0.001      |
| <b>Tea</b>               |                             |                             |                                  |                   |                 |                  |                   |             |
| Sat                      |                             |                             |                                  | 7109.816          | 2409            | 2291.816         | 11.63             |             |
| ADE <sup>1</sup>         | <b>0.51 (0.42, 0.58)</b>    | <b>0.00 (0.00, 0.03)</b>    | <b>0.49 (0.42, 0.58)</b>         | <b>7109.816</b>   | <b>2410</b>     | <b>2289.816</b>  | <b>0</b>          | <b>1.00</b> |
| AE <sup>2</sup>          | 0.50 (0.42, 0.58)           | -                           | 0.50 (0.42, 0.58)                | 7171.829          | 2410            | 2351.829         | 62.01             | <0.001      |
| DE <sup>2</sup>          | -                           | 0.19 (0.12, 0.26)           | 0.81 (0.74, 0.88)                | 7201.412          | 2411            | 2379.412         | 91.6              | <0.001      |
| E                        | -                           | -                           | 1.00 (1.00, 1.00)                | 7201.412          | 2411            | 2379.412         | 91.6              | <0.001      |
| <b>Coffee</b>            |                             |                             |                                  |                   |                 |                  |                   |             |
| Sat                      |                             |                             |                                  | 6351.94           | 1896            | 2559.94          |                   |             |
| ADE <sup>1</sup>         | 0.33 (0.14, 0.44)           | 0.00 (0.00, 0.12)           | 0.67 (0.56, 0.79)                | 6356.35           | 1899            | 2558.35          | 4.41              | 0.22        |
| AE <sup>2</sup>          | <b>0.33 (0.21, 0.44)</b>    | -                           | <b>0.67 (0.56, 0.79)</b>         | <b>6356.35</b>    | <b>1900</b>     | <b>2556.35</b>   | <b>0.00</b>       | <b>1.00</b> |
| DE <sup>2</sup>          | -                           | 0.17 (0.09, 0.25)           | 0.83 (0.75, 0.91)                | 6366.625          | 1900            | 2566.625         | 10.27             | <0.001      |
| E                        | -                           | -                           | 1.00 (1.00, 1.00)                | 6382.128          | 1901            | 2580.128         | 25.78             | <0.001      |

Maximum Likelihood Structural Equation Modelling (MLSEM) was used to derive estimates of A, D and E, as well as provide two goodness-of-fit statistics; -2LL and the AIC respectively. The selection of the most parsimonious model was indicated by the lowest absolute value of the AIC and smallest Δχ<sup>2</sup>.

<sup>1</sup> The full ADE model was nested within the saturated model

<sup>2</sup> Sub-models were nested within the full ADE model

<sup>3</sup> Abbreviations; - 2LL: -2 times log-likelihood of data, AIC: Akaike Information Criterion (AIC), df: degrees of freedom, NNSBs: Non-nutritive sweetened beverages, SSB: Sugar-sweetened beverages

**Supplemental Table 2** Beverage preference scores and tetrachoric correlations (TTC) by zygosity

| Beverage item            | n <sup>1</sup> (%) <sup>2</sup> | Mean preference score <sup>3</sup> (SD) | Median preference score <sup>3</sup> (SD) | MZ <sup>4</sup> TCC <sup>4</sup> (95% CI) | DZ <sup>4</sup> TCC <sup>4</sup> (95% CI) |
|--------------------------|---------------------------------|-----------------------------------------|-------------------------------------------|-------------------------------------------|-------------------------------------------|
| <b>SSBs<sup>4</sup></b>  | 2841 (99.2)                     | 3.73 (1.37)                             | 4.00 (1.38)                               | 0.47 (0.34, 0.59)                         | 0.11 (0.00, 0.23)                         |
| <b>NNSBs<sup>4</sup></b> | 2827 (98.7)                     | 3.64 (1.34)                             | 4.00 (1.33)                               | 0.48 (0.34, 0.59)                         | 0.22 (0.11, 0.34)                         |
| <b>Orange juice</b>      | 2849 (99.4)                     | 4.43 (0.97)                             | 5.00 (0.97)                               | 0.23 (0.05, 0.39)                         | 0.00 (0.00, 0.09)                         |
| <b>Fruit cordial</b>     | 2847 (99.3)                     | 4.23 (1.02)                             | 5.00 (1.02)                               | 0.54 (0.42, 0.64)                         | 0.20 (0.09, 0.31)                         |
| <b>Milk</b>              | 2707 (94.5)                     | 4.22 (0.95)                             | 5.00 (0.96)                               | 0.60 (0.48, 0.70)                         | 0.09 (0.02, 0.21)                         |
| <b>Tea</b>               | 2415 (84.3)                     | 4.31 (1.08)                             | 5.00 (1.08)                               | 0.73 (0.62, 0.82)                         | 0.04 (-0.09, 0.18)                        |
| <b>Coffee</b>            | 1905 (66.5)                     | 3.85 (1.29)                             | 4.00 (1.30)                               | 0.48 (0.30, 0.60)                         | 0.08 (-0.06, 0.25)                        |

<sup>1</sup> Number of observations included in mean and median beverage liking score (excl. observations from individuals that never consume the specific beverage)

<sup>2</sup> Percentage of the full sample that reported occasional consumption of the beverage

<sup>3</sup> Preference scores were rated on a 5-point Likert scale, with a higher score indicating a higher preference for the beverage item.

<sup>4</sup> Abbreviations: TCCs: Tetrachoric Correlations; MZ: Monozygotic; DZ: Dizygotic; NNSBs: Non-nutritive sweetened beverages, SSB: Sugar-sweetened beverages

**Supplemental Table 3** Threshold Model fit and parameter estimates for the saturated, ACE model and submodels of beverage preferences

| Beverage type                    | Additive genetic effect (A) | Shared environment effect (C) | Nonshared environment effect (E) | -2LL <sup>3</sup> | Df <sup>3</sup> | AIC <sup>3</sup> | Δ -2LL      | p-value     |
|----------------------------------|-----------------------------|-------------------------------|----------------------------------|-------------------|-----------------|------------------|-------------|-------------|
| <b>SSBs<sup>1,3</sup></b>        |                             |                               |                                  |                   |                 |                  |             |             |
| Sat                              |                             |                               |                                  | 3724.058          | 2830            | -1935.94         |             |             |
| ACE <sup>3</sup>                 | 0.42 (0.25, 0.52)           | 0.00 (0.00, 0.11)             | 0.58 (0.48, 1.00)                | 3737.736          | 2837            | -1936.26         | 13.68       | 0.06        |
| <b>AE<sup>4</sup></b>            | <b>0.42 (0.30, 0.52)</b>    | -                             | <b>0.58 (0.48, 1.00)</b>         | <b>3737.736</b>   | <b>2838</b>     | <b>-1938.26</b>  | <b>0.00</b> | <b>1.00</b> |
| CE <sup>4</sup>                  | -                           | 0.26 (0.17, 0.34)             | 0.74 (0.65, 1.00)                | 3750.700          | 2838            | -1925.3          | 12.96       | <0.001      |
| E <sup>4</sup>                   | -                           | -                             | 1.00 (1.00, 1.00)                | 3782.678          | 2839            | -1895.32         | 44.94       | <0.001      |
| <b>NNSBs<sup>1,3</sup></b>       |                             |                               |                                  |                   |                 |                  |             |             |
| Sat                              |                             |                               |                                  | 3510.043          | 2816            | -2121.957        |             |             |
| ACE <sup>3</sup>                 | 0.47 (0.15, 0.58)           | 0.00 (0.00, 0.24)             | 0.53 (0.42, 1.00)                | 3515.951          | 2823            | -2130.05         | 5.91        | 0.55        |
| <b>AE<sup>4</sup></b>            | <b>0.47 (0.41, 0.58)</b>    | -                             | <b>0.53 (0.42, 1.00)</b>         | 3515.951          | 2824            | -2132.05         | 0.00        | 1.00        |
| CE <sup>4</sup>                  | -                           | 0.33 (0.24, 0.41)             | 0.67 (0.59, 1.00)                | 3523.844          | 2824            | -2124.16         | 7.89        | <0.001      |
| E <sup>4</sup>                   | -                           | -                             | 1.00 (1.00, 1.00)                | 3572.634          | 2825            | -2077.37         | 56.68       | <0.001      |
| <b>Orange juice<sup>2</sup></b>  |                             |                               |                                  |                   |                 |                  |             |             |
| Sat                              |                             |                               |                                  | 2751.467          | 2495            | -2238.53         |             |             |
| ACE <sup>3</sup>                 | 0.23 (0.05, 0.39)           | 0.00 (0.00, 0.09)             | 0.77 (0.61, 0.95)                | 2902.347          | 2502            | -2101.65         | 150.88      | 0.00        |
| <b>AE<sup>4</sup></b>            | <b>0.23 (0.05, 0.39)</b>    | -                             | <b>0.77 (0.61, 0.95)</b>         | <b>2902.347</b>   | <b>2503</b>     | <b>-2103.65</b>  | <b>0.00</b> | <b>1.00</b> |
| CE <sup>4</sup>                  | -                           | 0.07 (0.00, 0.19)             | 0.92 (0.81, 1.00)                | 2907.614          | 2503            | -2098.39         | 5.27        | 0.02        |
| E <sup>4</sup>                   | -                           | -                             | 1.00 (1.00, 1.00)                | 2908.933          | 2504            | -2099.07         | 6.59        | 0.04        |
| <b>Fruit cordial<sup>2</sup></b> |                             |                               |                                  |                   |                 |                  |             |             |
| Sat                              |                             |                               |                                  | 3868.794          | 2836            | -1803.21         |             |             |
| ACE <sup>3</sup>                 | 0.51 (0.40, 0.61)           | 0.00 (0.00, 0.14)             | 0.49 (0.39, 0.60)                | 3874.622          | 2843            | -1811.38         | 5.83        | 0.56        |
| <b>AE<sup>4</sup></b>            | <b>0.51 (0.40, 0.61)</b>    | -                             | <b>0.49 (0.39, 0.60)</b>         | <b>3874.622</b>   | <b>2844</b>     | <b>-1813.38</b>  | <b>0.00</b> | <b>1.00</b> |
| CE <sup>4</sup>                  | -                           | 0.33 (0.25, 0.41)             | 0.67 (0.59, 1.00)                | 3889.705          | 2844            | -1798.30         | 15.08       | <0.001      |
| E <sup>4</sup>                   | -                           | -                             | 1.00 (1.00, 1.00)                | 3946.426          | 2845            | -1743.57         | 71.80       | <0.001      |
| <b>Milk<sup>2</sup></b>          |                             |                               |                                  |                   |                 |                  |             |             |
| Sat                              |                             |                               |                                  | 3671.885          | 2696            | -1720.12         |             |             |
| ACE <sup>3</sup>                 | 0.51 (0.39, 0.61)           | 0.00 (0.00, 0.07)             | 0.49 (0.39, 1.00)                | 3685.956          | 2703            | -1720.04         | 14.07       | 0.05        |
| <b>AE<sup>4</sup></b>            | <b>0.51 (0.39, 0.61)</b>    | -                             | <b>0.49 (0.39, 1.00)</b>         | <b>3685.956</b>   | <b>2704</b>     | <b>-1722.04</b>  | <b>0.00</b> | <b>1.00</b> |
| CE <sup>4</sup>                  | -                           | 0.29 (0.20, 0.38)             | 0.71 (0.62, 1.00)                | 3709.498          | 2704            | -1698.50         | 23.54       | <0.001      |
| E <sup>4</sup>                   | -                           | -                             | 1.00 (1.00, 1.00)                | 3749.390          | 2705            | -1660.61         | 63.43       | <0.001      |
| <b>Tea<sup>2</sup></b>           |                             |                               |                                  |                   |                 |                  |             |             |
| Sat                              |                             |                               |                                  | 3142.318          | 2404            | -1665.68         |             |             |
| ACE <sup>3</sup>                 | 0.62 (0.50, 1.00)           | 0.00 (0.00, 0.06)             | 0.38 (0.27, 1.00)                | 3164.124          | 2411            | -1657.88         | 21.81       | 0.00        |
| <b>AE<sup>4</sup></b>            | <b>0.62 (0.50, 1.00)</b>    | -                             | <b>0.38 (0.27, 1.00)</b>         | <b>3164.124</b>   | <b>2412</b>     | <b>-1659.88</b>  | <b>0.00</b> | <b>1.00</b> |
| CE <sup>4</sup>                  | -                           | 0.34 (0.24, 0.43)             | 0.66 (0.57, 1.00)                | 3198.295          | 2412            | -1625.71         | 34.17       | <0.001      |
| E <sup>4</sup>                   | -                           | -                             | 1.00 (1.00, 1.00)                | 3240.230          | 2413            | -1585.77         | 76.11       | <0.001      |
| <b>Coffee<sup>1</sup></b>        |                             |                               |                                  |                   |                 |                  |             |             |
| Sat                              |                             |                               |                                  | 2541.410          | 1894            | -1246.59         |             |             |
| ACE <sup>3</sup>                 | 0.41 (0.25, 0.56)           | 0.00 (0.00, 0.01)             | 0.59 (0.00, 1.00)                | 2548.027          | 1901            | -1253.97         | 6.62        | 0.47        |
| <b>AE<sup>4</sup></b>            | <b>0.41 (0.25, 0.56)</b>    | -                             | <b>0.59 (0.00, 1.00)</b>         | <b>2548.027</b>   | <b>1902</b>     | <b>-1255.97</b>  | <b>0.00</b> | <b>1.00</b> |
| CE <sup>4</sup>                  | -                           | 0.25 (0.12, 0.36)             | 0.75 (0.64, 1.00)                | 2555.393          | 1902            | -1248.61         | 7.37        | 0.01        |
| E <sup>4</sup>                   | -                           | -                             | 1.00 (1.00, 1.00)                | 2570.613          | 1903            | -1235.39         | 22.59       | <0.001      |

Maximum Likelihood Structural Equation Modelling (MLSEM) was used to derive estimates of A, C and E, as well as provide two goodness-of-fit statistics; -2LL and the AIC respectively. The selection of the most parsimonious model was indicated by the p-value and the lowest absolute value of the AIC.

<sup>1</sup> Preference score were split by the median value as =<4 vs >4

<sup>2</sup> Preference score were split by the median value as =<5 vs >=5

<sup>3</sup> The full ACE model was nested within the saturated model

<sup>4</sup> Sub-models were nested within the full ACE model

<sup>5</sup> Abbreviations; - 2LL: -2 times log-likelihood of data, df: degrees of freedom, AIC: Akaike Information Criterion (AIC), NNSBs: Non-nutritive sweetened beverages, SSB: Sugar-sweetened beverages

**Supplemental Table 4** Drink preference score intraclass correlations (ICC) by zygosity and sex

| Drink item (n <sup>1</sup> ) | MZ <sup>2</sup> ICC <sup>2</sup> (95% CI) |                 | MZ <sup>2</sup> ICC <sup>2</sup> (95% CI) |                | DZ ICC <sup>2</sup> (95% CI) |                 | DZ <sup>2</sup> ICC <sup>2</sup> (95% CI) |                 | DZ <sup>2</sup> ICC <sup>2</sup> (95% CI) |                 |
|------------------------------|-------------------------------------------|-----------------|-------------------------------------------|----------------|------------------------------|-----------------|-------------------------------------------|-----------------|-------------------------------------------|-----------------|
|                              | MM                                        |                 | FF                                        |                | MM                           |                 | FF                                        |                 | os                                        |                 |
| <b>SSBs</b> (n=2841)         | 0.294                                     | (0.145, 0.429)  | 0.414                                     | (0.314, 0.504) | 0.265                        | (0.102, 0.412)  | 0.207                                     | (0.093, 0.314)  | 0.000                                     | (-0.106, 0.104) |
| <b>NNSBs</b> (n=2827)        | 0.363                                     | (0.220, 0.489)  | 0.408                                     | (0.307, 0.500) | 0.214                        | (0.045, 0.368)  | 0.306                                     | (0.198, 0.403)  | 0.162                                     | (0.061, 0.258)  |
| <b>Fruit squash</b> (n=2847) | 0.359                                     | (0.202, 0.494)  | 0.440                                     | (0.346, 0.526) | 0.234                        | (0.057, 0.393)  | 0.162                                     | (0.057, 0.263)  | 0.271                                     | (0.160, 0.371)  |
| <b>Orange juice</b> (n=2849) | 0.111                                     | (-0.042, 0.258) | 0.316                                     | (0.207, 0.415) | -0.020                       | (-0.190, 0.152) | 0.005                                     | (-0.105, 0.114) | -0.041                                    | (-0.146, 0.066) |
| <b>Milk</b> (n=2707)         | 0.263                                     | (0.113, 0.400)  | 0.431                                     | (0.322, 0.527) | -0.043                       | (-0.230, 0.147) | 0.126                                     | (0.012, 0.235)  | 0.040                                     | (-0.090, 0.168) |
| <b>Tea</b>                   | 0.111                                     | (-0.042, 0.258) | 0.316                                     | (0.207, 0.415) | -0.020                       | (-0.190, 0.152) | 0.005                                     | (-0.105, 0.114) | -0.041                                    | (-0.146, 0.066) |
| <b>Coffee</b>                | 0.263                                     | (0.113, 0.400)  | 0.431                                     | (0.322, 0.527) | -0.043                       | (-0.230, 0.147) | 0.126                                     | (0.012, 0.235)  | 0.040                                     | (-0.090, 0.168) |

Preference scores were rated on a 5-point Likert scale, with a higher score indicating a higher preference for the drink item.

<sup>1</sup> Number of observations included in mean drink liking score (excl. observations from individuals that never consuming the specific drink)

<sup>2</sup> Abbreviations: ICCs: Intraclass Correlations; MZ: Monozygotic; DZ: Dizygotic; FF: same sex female pairs only; MM: same sex male pairs only; os: opposite-sex pairs only

**Supplemental Table 5** Parameters estimates (95% Confidence intervals) for A, C and E for males and females considering qualitative and quantitative sex differences for the liking for sugar-sweetened beverages

| Model                                                                  | Male                |                     |                     | Female              |                     |                     | $r_A^1$             | $r_C^1$             |
|------------------------------------------------------------------------|---------------------|---------------------|---------------------|---------------------|---------------------|---------------------|---------------------|---------------------|
|                                                                        | $A_m^1$             | $C_m^1$             | $E_m^1$             | $A_f^1$             | $C_f^1$             | $E_f^1$             |                     |                     |
| <b>Full sex limitation (<math>r_A</math>=free)</b>                     | 0.11<br>(0.00-0.48) | 0.26<br>(0.04-0.44) | 0.63<br>(0.51-0.76) | 0.36<br>(0.12-0.48) | 0.04<br>(0.00-0.24) | 0.60<br>(0.50-0.68) | 0.24<br>(0.00-0.50) | 1.00                |
| <b>Full sex limitation (<math>r_C</math>=free)</b>                     | 0.09<br>(0.00-0.37) | 0.28<br>(0.06-0.44) | 0.63<br>(0.51-0.76) | 0.35<br>(0.08-0.48) | 0.05<br>(0.00-0.27) | 0.60<br>(0.52-0.69) | 0.5                 | 1.00<br>(0.33-1.00) |
| <b>Common effects model (<math>r_A=0.5</math>, <math>r_C=1</math>)</b> | 0.09<br>(0.00-0.37) | 0.28<br>(0.06-0.45) | 0.63<br>(0.51-0.76) | 0.35<br>(0.12-0.48) | 0.05<br>(0.00-0.24) | 0.60<br>(0.52-0.69) | 0.5                 | 1.00                |
|                                                                        | <b>A</b>            |                     | <b>C</b>            |                     | <b>E</b>            |                     | <b>Scalar</b>       |                     |
| <b>Scalar Model</b>                                                    | 0.35<br>(0.27-0.42) |                     | 0.00<br>(0.00-0.06) |                     | 0.65<br>(0.58-0.73) |                     | 1.09<br>(1.03-1.15) |                     |
|                                                                        | <b>A</b>            |                     | <b>C</b>            |                     | <b>E</b>            |                     | $r_A$               | $r_C$               |
| <b>Homogeneity model (no sex differences)</b>                          | 0.35<br>(0.27-0.42) |                     | 0.00<br>(0.00-0.06) |                     | 0.65<br>(0.58-0.73) |                     | 0.5                 | 1.00                |

<sup>1</sup> Abbreviations: A: additive genetic component of variance; C: shared environmental component of variance; E: unique environmental component of variance;  $r_A$ : genetic correlation,  $r_C$ : shared environmental correlation,  $r_E$ : non-shared environmental correlation.

**Supplemental Table 5.1** Heterogeneity model fit statistics for the liking of sugar-sweetened beverages

| Model                                                                    | Comparison       | $E_p^1$  | -2LL <sup>1</sup> | $df^1$      | AIC <sup>1</sup> | $\Delta$ -2LL | $\Delta df$ | p-value     | $\Delta$ AIC  |
|--------------------------------------------------------------------------|------------------|----------|-------------------|-------------|------------------|---------------|-------------|-------------|---------------|
| 1 Saturated model                                                        |                  | 23       | 9626.144          | 2818        | 3990.144         |               |             |             |               |
| 2 Full sex limitation ( $r_A$ =free)                                     | 1                | 9        | 9699.952          | 2832        | 4035.952         | 73.808        | 14          | <0.001      | -45.808       |
| 3 Full sex limitation ( $r_C$ =free)                                     | 1                | 9        | 9699.952          | 2832        | 4035.952         | 73.808        | 14          | <0.001      | -45.808       |
| <b>4 Common effects model (<math>r_A=0.5</math>, <math>r_C=1</math>)</b> | <b>2 &amp; 3</b> | <b>8</b> | <b>9699.952</b>   | <b>2833</b> | <b>4033.952</b>  | <b>0.000</b>  | <b>1</b>    | <b>1.00</b> | <b>-2.000</b> |
| 5 Scalar Model                                                           | 4                | 6        | 9722.293          | 2835        | 4052.293         | 22.341        | 2           | <0.001      | -18.341       |
| 6 Homogeneity model (no sex differences)                                 | 5                | 5        | 9732.027          | 2836        | 4060.027         | 9.734         | 1           | 0.002       | -7.734        |

**Supplemental Table 6** Parameters estimates (95% Confidence intervals) for A, C and E for males and females considering qualitative and quantitative sex differences in the liking for non-nutritive sweetened beverages

| Model                                                                  | Male                |                     |                     | Female              |                     |                     | $r_A^1$             | $r_C^1$             |
|------------------------------------------------------------------------|---------------------|---------------------|---------------------|---------------------|---------------------|---------------------|---------------------|---------------------|
|                                                                        | $A_m^1$             | $C_m^1$             | $E_m^1$             | $A_f^1$             | $C_f^1$             | $E_f^1$             |                     |                     |
| <b>Full sex limitation (<math>r_A</math>=free)</b>                     | 0.34<br>(0.05-0.50) | 0.04<br>(0.00-0.32) | 0.61<br>(0.50-0.26) | 0.18<br>(0.08-0.46) | 0.22<br>(0.08-0.41) | 0.60<br>(0.51-0.70) | 0.5<br>(0.39-0.50)  | 1.00                |
| <b>Full sex limitation (<math>r_C</math>=free)</b>                     | 0.34<br>(0.12-0.50) | 0.04<br>(0.00-0.36) | 0.61<br>(0.50-0.76) | 0.18<br>(0.04-0.46) | 0.22<br>(0.08-0.41) | 0.60<br>(0.51-0.70) | 0.5                 | 1.00<br>(0.88-1.00) |
| <b>Common effects model (<math>r_A=0.5</math>, <math>r_C=1</math>)</b> | 0.39<br>(0.24-0.50) | 0.00<br>(0.00-0.34) | 0.61<br>(0.18-0.26) | 0.18<br>(0.07-0.46) | 0.22<br>(0.10-0.41) | 0.60<br>(0.51-0.70) | 0.5                 | 1.00                |
|                                                                        | <b>A</b>            |                     | <b>C</b>            |                     | <b>E</b>            |                     | <b>Scalar</b>       |                     |
| <b>Scalar Model</b>                                                    | 0.36<br>(0.15-0.47) |                     | 0.04<br>(0.00-0.19) |                     | 0.60<br>(0.17-0.21) |                     | 1.03<br>(0.97-1.09) |                     |
|                                                                        | <b>A</b>            |                     | <b>C</b>            |                     | <b>E</b>            |                     | $r_A$               | $r_C$               |
| <b>Homogeneity model (no sex differences)</b>                          | 0.35<br>(0.15-0.47) |                     | 0.05<br>(0.04-0.19) |                     | 0.60<br>(0.53-0.68) |                     | 0.5                 | 1.00                |

<sup>1</sup> Abbreviations: A: additive genetic component of variance; C: shared environmental component of variance; E: unique environmental component of variance;  $r_A$ : genetic correlation,  $r_C$ : shared environmental correlation,  $r_E$ : non-shared environmental correlation.

**Supplemental Table 6.1** Heterogeneity model fit statistics for the liking of non-nutritive sweetened beverages

| Model                                           | Comparison | $E_p^1$  | -2LL <sup>1</sup> | df <sup>1</sup> | AIC <sup>1</sup> | $\Delta$ -2LL | $\Delta$ df | p-value      | $\Delta$ AIC  |
|-------------------------------------------------|------------|----------|-------------------|-----------------|------------------|---------------|-------------|--------------|---------------|
| 1 Saturated model                               |            | 23       | 9537.307          | 2804            | 3929.307         |               |             |              |               |
| 2 Full sex limitation ( $r_A$ =free)            | 1          | 9        | 9545.274          | 2818            | 3909.274         | 7.967         | 14          | 0.891        | 20.033        |
| 3 Full sex limitation ( $r_C$ =free)            | 1          | 9        | 9545.274          | 2818            | 3909.274         | 7.967         | 14          | 0.891        | 20.033        |
| 4 Common effects model ( $r_A=0.5$ , $r_C=1$ )  | 2 & 3      | 8        | 9545.325          | 2819            | 3907.325         | 0.052         | 1           | 0.820        | -2.00         |
| 5 Scalar Model                                  | 4          | 6        | 9549.760          | 2821            | 3907.760         | 4.4345        | 2           | 0.109        | 0.435         |
| <b>6 Homogeneity model (no sex differences)</b> | <b>5</b>   | <b>5</b> | <b>9551.006</b>   | <b>2822</b>     | <b>3907.006</b>  | <b>1.2462</b> | <b>1</b>    | <b>0.264</b> | <b>-0.754</b> |

**Supplemental Table 7** Parameters estimates (95% Confidence intervals) for A, C and E for males and females considering qualitative and quantitative sex differences in the liking for fruit cordial

| Model                                                                | Male                |                     |                     | Female              |                     |                     | $r_A^1$                  | $r_C^1$             |
|----------------------------------------------------------------------|---------------------|---------------------|---------------------|---------------------|---------------------|---------------------|--------------------------|---------------------|
|                                                                      | $A_m^1$             | $C_m^1$             | $E_m^1$             | $A_f^1$             | $C_f^1$             | $E_f^1$             |                          |                     |
| <b>Full sex limitation (<math>r_A</math>=free)</b>                   | 0.10<br>(0.36-0.36) | 0.28<br>(0.15-0.45) | 0.62<br>(0.18-0.78) | 0.28<br>(0.11-0.41) | 0.12<br>(0.03-0.25) | 0.60<br>(0.52-0.69) | 0.5<br>(0.00-0.50)       | 1.00                |
| <b>Full sex limitation (<math>r_C</math>=free)</b>                   | 0.38<br>(0.23-0.55) | 0.05<br>(0.22-0.36) | 0.57<br>(0.45-0.71) | 0.42<br>(0.51-0.50) | 0.00<br>(0.00-0.16) | 0.58<br>(0.50-0.67) | 0.5                      | 1.00<br>(0.88-1.00) |
| <b>Common effects model Both fixes (<math>r_A=0.5, r_C=1</math>)</b> | 0.38<br>(0.23-0.55) | 0.05<br>(0.22-0.36) | 0.57<br>(0.45-0.71) | 0.42<br>(0.51-0.50) | 0.00<br>(0.00-0.15) | 0.58<br>(0.50-0.67) | 0.5                      | 1.00                |
|                                                                      | <b>A</b>            |                     | <b>C</b>            |                     | <b>E</b>            |                     | <b>Scalar</b>            |                     |
| <b>Scalar Model</b>                                                  | 0.32<br>(0.49-0.67) |                     | 0.00<br>(0.15-9.21) |                     | 0.68<br>(0.17-0.21) |                     | -1.17<br>(-1.24-; -1.11) |                     |
|                                                                      | <b>A</b>            |                     | <b>C</b>            |                     | <b>E</b>            |                     | $r_A$                    | $r_C$               |
| <b>Homogeneity model (no sex differences)</b>                        | 0.42<br>(0.36-0.49) |                     | 0.00<br>(0.00-0.15) |                     | 0.58<br>(0.52-0.64) |                     | 0.5                      | 1.00                |

<sup>1</sup> Abbreviations: A: additive genetic component of variance; C: shared environmental component of variance; E: unique environmental component of variance;  $r_A$ : genetic correlation,  $r_C$ : shared environmental correlation,  $r_E$ : non-shared environmental correlation.

**Supplemental Table 7.1** Heterogeneity model fit statistics for the liking of fruit cordial

| Model                                                       | Comparison       | $E_p^1$  | -2LL <sup>1</sup> | df <sup>1</sup> | AIC <sup>1</sup> | $\Delta$ -2LL | $\Delta$ df | p-value     | $\Delta$ AIC |
|-------------------------------------------------------------|------------------|----------|-------------------|-----------------|------------------|---------------|-------------|-------------|--------------|
| 1 Saturated model                                           |                  | 23       | 7980.13           | 2824            | 2332.13          |               |             |             |              |
| 2 Full sex limitation ( $r_A$ =free)                        | 1                | 9        | 8001.96           | 2838            | 2325.96          | 21.829        | 14          | 0.082       | -6.17        |
| 3 Full sex limitation ( $r_C$ =free)                        | 1                | 9        | 8001.96           | 2838            | 2325.96          | 21.829        | 14          | 0.082       | -6.17        |
| <b>4 Common effects model (<math>r_A=0.5, r_C=1</math>)</b> | <b>2 &amp; 3</b> | <b>8</b> | <b>8001.96</b>    | <b>2839</b>     | <b>2323.96</b>   | <b>0</b>      | <b>1</b>    | <b>1.00</b> | <b>-2.00</b> |
| 5 Scalar Model                                              | 4                | 6        | 8063.671          | 2841            | 2381.67          | 61.7113       | 2           | <0.001      | -57.71       |
| 6 Homogeneity model (no sex differences)                    | 5                | 5        | 8038.078          | 2842            | 2354.08          | -25.593       | 1           | 1.00        | -27.59       |



**Supplemental Table 8** Parameters estimates (95% Confidence intervals) for A, C and E for males and females considering qualitative and quantitative sex differences in the liking for orange juice

| Model                                                                  | Male                |                     |                     | Female              |                     |                     | $r_A^1$             | $r_C^1$             |
|------------------------------------------------------------------------|---------------------|---------------------|---------------------|---------------------|---------------------|---------------------|---------------------|---------------------|
|                                                                        | $A_m^1$             | $C_m^1$             | $E_m^1$             | $A_f^1$             | $C_f^1$             | $E_f^1$             |                     |                     |
| <b>Full sex limitation (<math>r_A</math>=free)</b>                     | 0.11<br>(0.00-0.27) | 0.00<br>(0.00-0.16) | 0.89<br>(0.73-1.00) | 0.25<br>(0.10-0.35) | 0.00<br>(0.00-0.10) | 0.75<br>(0.65-0.85) | 0.00<br>(0.00-0.50) | 1.00                |
| <b>Full sex limitation (<math>r_C</math>=free)</b>                     | 0.07<br>(0.00-0.23) | 0.01<br>(0.00-0.16) | 0.92<br>(0.77-1.0)  | 0.25<br>(0.13-0.35) | 0.00<br>(0.00-0.09) | 0.75<br>(0.65-0.85) | 0.5                 | 1.00<br>(0.00-1.00) |
| <b>Common effects model (<math>r_A=0.5</math>, <math>r_C=1</math>)</b> | 0.07<br>(0.00-0.23) | 0.01<br>(0.00-0.16) | 0.92<br>(0.77-1.0)  | 0.25<br>(0.13-0.35) | 0.00<br>(0.00-0.09) | 0.75<br>(0.65-0.85) | 0.5                 | 1.00                |
|                                                                        | <b>A</b>            |                     | <b>C</b>            |                     | <b>E</b>            |                     | <b>Scalar</b>       |                     |
| <b>Scalar Model</b>                                                    | 0.17<br>(0.08-0.25) |                     | 0.00<br>(0.00-0.05) |                     | 0.83<br>(0.75-0.91) |                     | 1.11<br>(1.05-1.17) |                     |
|                                                                        | <b>A</b>            |                     | <b>C</b>            |                     | <b>E</b>            |                     | $r_A$               | $r_C$               |
| <b>Homogeneity model (no sex differences)</b>                          | 0.18<br>(0.09-0.25) |                     | 0.00<br>(0.00-0.04) |                     | 0.82<br>(0.74-0.90) |                     | 0.5                 | 1.00                |

<sup>1</sup> Abbreviations: A: additive genetic component of variance; C: shared environmental component of variance; E: unique environmental component of variance;  $r_A$ : genetic correlation,  $r_C$ : shared environmental correlation,  $r_E$ : non-shared environmental correlation.

**Supplemental Table 8.1** Heterogeneity model fit statistics for the liking of orange juice

| Model                                                                    | Comparison       | $E_p^1$  | $-2LL^1$        | $df^1$      | $AIC^1$         | $\Delta-2LL$ | $\Delta df$ | p-value  | $\Delta AIC$ |
|--------------------------------------------------------------------------|------------------|----------|-----------------|-------------|-----------------|--------------|-------------|----------|--------------|
| 1 Saturated model                                                        |                  | 23       | 7794.922        | 2826        | 2142.922        |              |             |          |              |
| 2 Full sex limitation ( $r_A$ =free)                                     | 1                | 9        | 7843.993        | 2840        | 2163.993        | 49.07021     | 14          | <0.001   | 21.071       |
| 3 Full sex limitation ( $r_C$ =free)                                     | 1                | 9        | 7843.993        | 2840        | 2163.993        | 49.07021     | 14          | <0.001   | 21.071       |
| <b>4 Common effects model (<math>r_A=0.5</math>, <math>r_C=1</math>)</b> | <b>2 &amp; 3</b> | <b>8</b> | <b>7843.993</b> | <b>2841</b> | <b>2161.993</b> | <b>0.00</b>  | <b>1</b>    | <b>1</b> | <b>-2.00</b> |
| 5 Scalar Model                                                           | 4                | 6        | 7852.797        | 2843        | 2166.797        | 8.804509     | 2           | 0.012    | 4.804        |
| 6 Homogeneity model (no sex differences)                                 | 5                | 5        | 7866.917        | 2844        | 2178.917        | 14.11965     | 1           | <0.001   | 12.120       |

**Supplemental Table 9** Parameters estimates (95% Confidence intervals) for A, C and E for males and females considering qualitative and quantitative sex differences for the liking for milk

| Model                                                                  | Male                |                     |                     | Female              |                     |                     | $r_A^1$             | $r_C^1$             |
|------------------------------------------------------------------------|---------------------|---------------------|---------------------|---------------------|---------------------|---------------------|---------------------|---------------------|
|                                                                        | $A_m^1$             | $C_m^1$             | $E_m^1$             | $A_f^1$             | $C_f^1$             | $E_f^1$             |                     |                     |
| <b>Full sex limitation (<math>r_A</math>=free)</b>                     | 0.26<br>(0.07-0.41) | 0.00<br>(0.00-0.21) | 0.74<br>(0.59-0.90) | 0.38<br>(0.19-0.47) | 0.00<br>(0.10-0.32) | 0.62<br>(0.14-0.19) | 0.5<br>(0.30-0.50)  | 1.00                |
| <b>Full sex limitation (<math>r_C</math>=free)</b>                     | 0.14<br>(0.00-0.34) | 0.09<br>(0.00-0.28) | 0.78<br>(0.62-0.94) | 0.33<br>(0.12-0.46) | 0.04<br>(0.00-0.20) | 0.63<br>(0.54-0.73) | 0.5                 | 1.00<br>(0.00-1.00) |
| <b>Common effects model (<math>r_A=0.5</math>, <math>r_C=1</math>)</b> | 0.14<br>(0.00-0.34) | 0.09<br>(0.00-0.28) | 0.78<br>(0.62-0.94) | 0.33<br>(0.17-0.46) | 0.04<br>(0.00-0.20) | 0.63<br>(0.54-0.72) | 0.5                 | 1.00                |
|                                                                        | <b>A</b>            |                     | <b>C</b>            |                     | <b>E</b>            |                     | <b>Scalar</b>       |                     |
| <b>Scalar Model</b>                                                    | 0.31<br>(0.22-0.39) |                     | 0.00<br>(0.00-0.05) |                     | 0.69<br>(0.61-0.77) |                     | 1.13<br>(1.07-1.19) |                     |
|                                                                        | <b>A</b>            |                     | <b>C</b>            |                     | <b>E</b>            |                     | $r_A$               | $r_C$               |
| <b>Homogeneity model (no sex differences)</b>                          | 0.32<br>(0.22-0.39) |                     | 0.00<br>(0.00-0.05) |                     | 0.68<br>(0.61-0.76) |                     | 0.5                 | 1.00                |

<sup>1</sup> Abbreviations: A: additive genetic component of variance; C: shared environmental component of variance; E: unique environmental component of variance;  $r_A$ : genetic correlation,  $r_C$ : shared environmental correlation,  $r_E$ : non-shared environmental correlation.

**Supplemental Table 9.1** Heterogeneity model fit statistics for the liking of milk

| Model                                          | Comparison | $E_p^1$  | -2LL <sup>1</sup> | df <sup>1</sup> | AIC <sup>1</sup> | $\Delta$ -2LL   | $\Delta$ df | p-value      | $\Delta$ AIC |
|------------------------------------------------|------------|----------|-------------------|-----------------|------------------|-----------------|-------------|--------------|--------------|
| 1 Saturated model                              |            | 23       | 7256.141          | 2684            | 1888.141         |                 |             |              |              |
| 2 Full sex limitation ( $r_A$ =free)           | 1          | 9        | 7319.099          | 2698            | 1923.099         | 62.95796        | 14          | <0.001       | 45.808       |
| 3 Full sex limitation ( $r_C$ =free)           | 1          | 9        | 7319.099          | 2698            | 1923.099         | 62.95796        | 14          | <0.001       | 45.808       |
| 4 Common effects model ( $r_A=0.5$ , $r_C=1$ ) | 2 & 3      | 8        | 7319.099          | 2699            | 1921.099         | 0.00            | 1           | 0.102        | 2.00         |
| <b>5 Scalar Model</b>                          | <b>4</b>   | <b>6</b> | <b>7325.083</b>   | <b>2701</b>     | <b>1923.083</b>  | <b>5.984397</b> | <b>2</b>    | <b>0.050</b> | <b>1.984</b> |
| 6 Homogeneity model (no sex differences)       | 5          | 5        | 7344.600          | 2702            | 1940.600         | 19.51656        | 1           | <0.001       | 17.517       |

**Supplemental Table 10** Parameters estimates (95% Confidence intervals) for A, C and E for males and females considering qualitative and quantitative sex differences for the liking for coffee

| Model                                                                  | Male                |                     |                     | Female              |                     |                     | $r_A^1$             | $r_C^1$             |
|------------------------------------------------------------------------|---------------------|---------------------|---------------------|---------------------|---------------------|---------------------|---------------------|---------------------|
|                                                                        | $A_m^1$             | $C_m^1$             | $E_m^1$             | $A_f^1$             | $C_f^1$             | $E_f^1$             |                     |                     |
| <b>Full sex limitation (<math>r_A</math>=free)</b>                     | 0.06<br>(0.00-0.41) | 0.15<br>(0.04-0.34) | 0.79<br>(0.51-0.95) | 0.34<br>(0.12-0.46) | 0.00<br>(0.00-0.14) | 0.66<br>(0.53-0.81) | 0.50<br>(0.00-0.50) | 1.00                |
| <b>Full sex limitation (<math>r_C</math>=free)</b>                     | 0.06<br>(0.00-0.37) | 0.15<br>(0.00-0.34) | 0.79<br>(0.61-0.95) | 0.34<br>(0.12-0.47) | 0.00<br>(0.00-0.15) | 0.66<br>(0.53-0.81) | 0.5                 | 1.00<br>(0.00-1.00) |
| <b>Common effects model (<math>r_A=0.5</math>, <math>r_C=1</math>)</b> | 0.06<br>(0.00-0.37) | 0.15<br>(0.00-0.34) | 0.79<br>(0.61-0.95) | 0.34<br>(0.12-0.47) | 0.00<br>(0.00-0.14) | 0.66<br>(0.53-0.81) | 0.5                 | 1.00                |
|                                                                        | <b>A</b>            |                     | <b>C</b>            |                     | <b>E</b>            |                     | <b>Scalar</b>       |                     |
| <b>Scalar Model</b>                                                    | 0.29<br>(0.11-0.39) |                     | 0.00<br>(0.00-0.06) |                     | 0.71<br>(0.61-0.83) |                     | 1.06<br>(1.00-1.14) |                     |
|                                                                        | <b>A</b>            |                     | <b>C</b>            |                     | <b>E</b>            |                     | $r_A$               | $r_C$               |
| <b>Homogeneity model (no sex differences)</b>                          | 0.29<br>(0.11-0.39) |                     | 0.00<br>(0.00-0.11) |                     | 0.71<br>(0.61-0.82) |                     | 0.5                 | 1.00                |

<sup>1</sup> Abbreviations: A: additive genetic component of variance; C: shared environmental component of variance; E: unique environmental component of variance;  $r_A$ : genetic correlation,  $r_C$ : shared environmental correlation,  $r_E$ : non-shared environmental correlation.

**Supplemental Table 10.1** Heterogeneity model fit statistics for the liking of SSBs

| Model                                          | Comparison | $E_p^1$ | -2LL <sup>1</sup> | df <sup>1</sup> | AIC <sup>1</sup> | $\Delta$ -2LL | $\Delta$ df | p-value      | $\Delta$ AIC  |
|------------------------------------------------|------------|---------|-------------------|-----------------|------------------|---------------|-------------|--------------|---------------|
| 1 Saturated model                              |            | 23      | 6333.358          | 1882            | 2569.358         |               |             |              |               |
| 2 Full sex limitation ( $r_A$ =free)           | 1          | 9       | 6349.578          | 1896            | 2557.578         | 16.220        | 14          | 0.30         | 11.78         |
| 3 Full sex limitation ( $r_C$ =free)           | 1          | 9       | 6349.578          | 1896            | 2557.578         | 16.220        | 14          | 0.30         | 11.78         |
| 4 Common effects model ( $r_A=0.5$ , $r_C=1$ ) | 2 & 3      | 8       | 6349.578          | 1897            | 2555.578         | 0             | 1           | 0.999        | 2             |
| 5 Scalar Model                                 | 4          | 6       | 6351.370          | 1899            | 2553.370         | 1.7917        | 2           | 0.408        | 2.208         |
| 6 Homogeneity model (no sex differences)       | 5          | 5       | <b>6355.027</b>   | <b>1900</b>     | <b>2555.027</b>  | <b>3.6571</b> | <b>1</b>    | <b>0.056</b> | <b>-1.657</b> |

**Supplemental Table 11** Parameters estimates (95% Confidence intervals) for A, C and E for males and females considering qualitative and quantitative sex differences for the liking for tea

| Model                                                                  | Male                |                     |                     | Female              |                     |                     | $r_A^1$             | $r_C^1$             |
|------------------------------------------------------------------------|---------------------|---------------------|---------------------|---------------------|---------------------|---------------------|---------------------|---------------------|
|                                                                        | $A_m^1$             | $C_m^1$             | $E_m^1$             | $A_f^1$             | $C_f^1$             | $E_f^1$             |                     |                     |
| <b>Full sex limitation (<math>r_A</math>=free)</b>                     | 0.42<br>(0.23-0.55) | 0.00<br>(0.00-0.12) | 0.58<br>(0.45-0.74) | 0.49<br>(0.12-0.48) | 0.00<br>(0.00-0.06) | 0.51<br>(0.42-0.62) | 0.02<br>(0.00-0.32) | 1.00                |
| <b>Full sex limitation (<math>r_C</math>=free)</b>                     | 0.24<br>(0.00-0.37) | 0.10<br>(0.06-0.44) | 0.66<br>(0.51-0.76) | 0.44<br>(0.28-0.48) | 0.03<br>(0.00-0.27) | 0.53<br>(0.43-0.69) | 0.5                 | 1.00<br>(0.00-1.00) |
| <b>Common effects model (<math>r_A=0.5</math>, <math>r_C=1</math>)</b> | 0.26<br>(0.00-0.46) | 0.09<br>(0.00-0.29) | 0.66<br>(0.50-0.84) | 0.45<br>(0.28-0.48) | 0.02<br>(0.00-0.13) | 0.53<br>(0.43-0.65) | 0.5                 | 1.00                |
|                                                                        | <b>A</b>            |                     | <b>C</b>            |                     | <b>E</b>            |                     | <b>Scalar</b>       |                     |
| <b>Scalar Model</b>                                                    | 0.41<br>(0.37-0.50) |                     | 0.00<br>(0.00-0.03) |                     | 0.59<br>(0.50-0.68) |                     | 1.05<br>(0.99-1.11) |                     |
|                                                                        | <b>A</b>            |                     | <b>C</b>            |                     | <b>E</b>            |                     | $r_A$               | $r_C$               |
| <b>Homogeneity model (no sex differences)</b>                          | 0.41<br>(0.32-0.50) |                     | 0.00<br>(0.00-0.03) |                     | 0.59<br>(0.50-0.68) |                     | 0.5                 | 1.00                |

<sup>1</sup> Abbreviations: A: additive genetic component of variance; C: shared environmental component of variance; E: unique environmental component of variance;  $r_A$ : genetic correlation,  $r_C$ : shared environmental correlation,  $r_E$ : non-shared environmental correlation.

**Supplemental Table 11.1** Heterogeneity model fit statistics for the liking of SSBs

| Model                                          | Comparison | $E_p^1$ | -2LL <sup>1</sup> | df <sup>1</sup> | AIC <sup>1</sup> | $\Delta$ -2LL | $\Delta$ df | p-value | $\Delta$ AIC |
|------------------------------------------------|------------|---------|-------------------|-----------------|------------------|---------------|-------------|---------|--------------|
| 1 Saturated model                              |            | 23      | 7087.299          | 2392            | 2303.299         |               |             |         |              |
| 2 Full sex limitation ( $r_A$ =free)           | 1          | 9       | 7130.539          | 2406            | 2318.539         | 43.2395       | 14          | <0.001  | -15.24       |
| 3 Full sex limitation ( $r_C$ =free)           | 1          | 9       | 7130.539          | 2406            | 2318.539         | 43.2395       | 14          | <0.001  | 11.78        |
| 4 Common effects model ( $r_A=0.5$ , $r_C=1$ ) | 2 & 3      | 8       | 7129.800          | 2407            | 2315.800         | 0.73889       | 1           | 1.00    | 2.739        |
| 5 Scalar Model                                 | 4          | 6       | 7136.686          | 2410            | 2316.686         | 2.55734       | 2           | 0.110   | -0.886       |
| 6 Homogeneity model (no sex differences)       | 5          | 5       | 7134.129          | 2409            | 2316.129         | 4.32895       | 1           | 0.115   | 0.557        |
